# Supplementary material for: Ruthenium(ii) N,S-heterocyclic carbene complexes and transfer hydrogenation of ketones
Source: Royal Society of Chemistry journal article supplement (doi:10.1039/c0dt00562b), 2010-01-01
Supplement: c0dt00562b.pdf [file c0dt00562b.pdf]

## Supporting Information

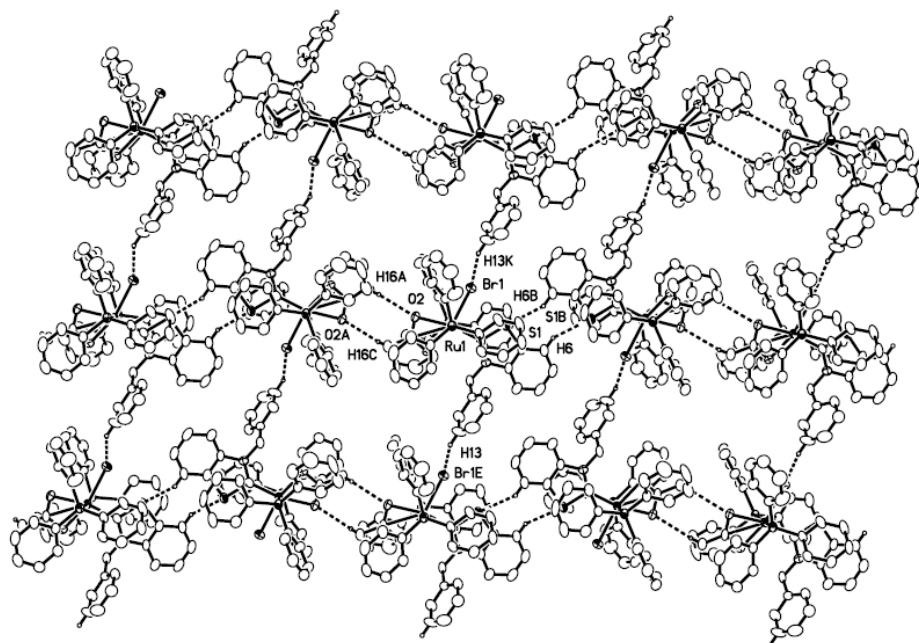

4: O2 $\cdots$ H16A, 2.667 Å; S1 $\cdots$ H6B, 2.883 Å; Br1E $\cdots$ H13, 2.985 Å (A: -x+1, -y+1, -z+1; B: -x, -y, -z; E: x+1, y, z)

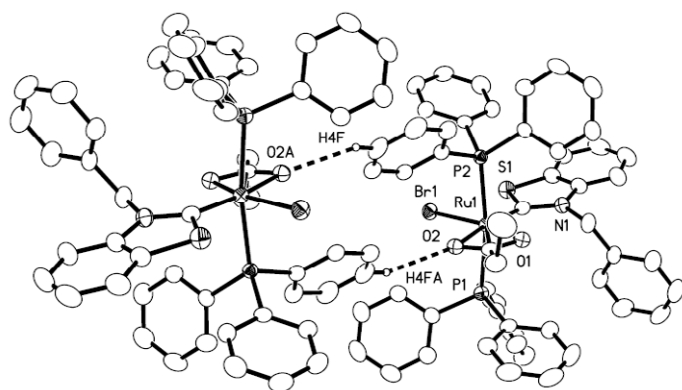

5: O2A $\cdots$ H4F, 2.630 Å (A: -x+1, -y+1, -z)

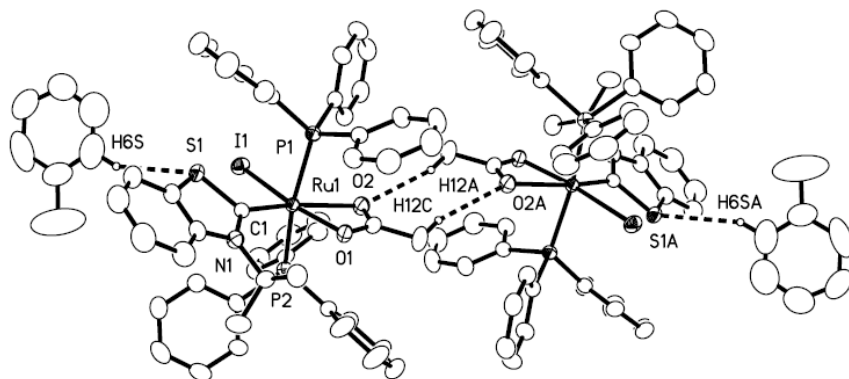

6: O2...H12A, 2.601 Å; S2...H6S, 2.902 Å (A: -x+2, -y+1, -z+1)

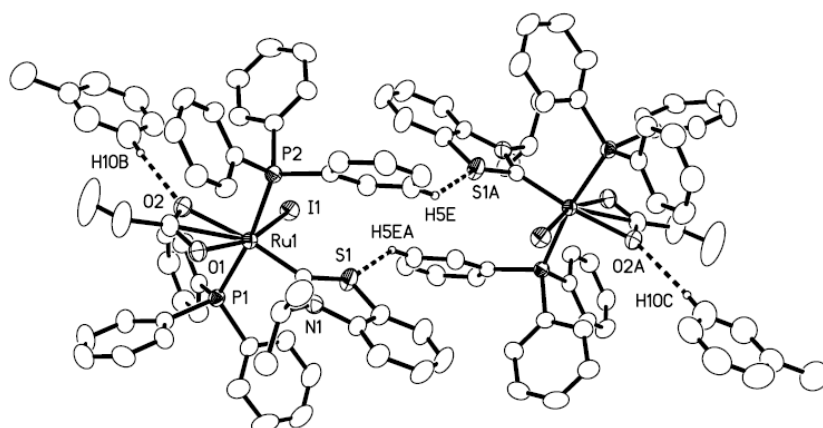

7: S1A...H5E, 2.872 Å; O2...H10B, 2.639 Å (A: -x, -y+1, -z+1)

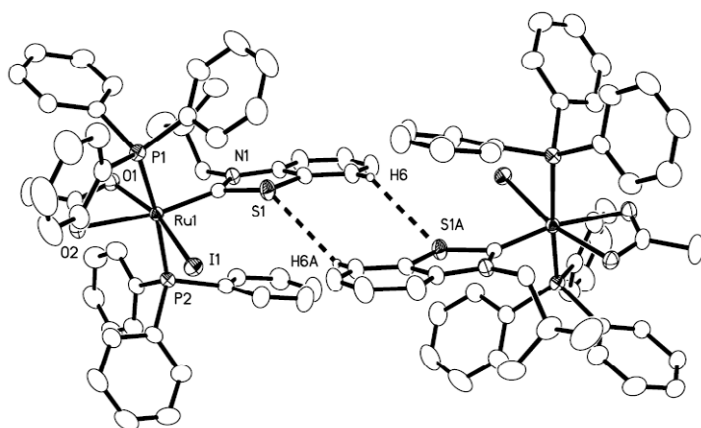

8: S1...H6A, 2.906 Å (A: -x, -y, -z)

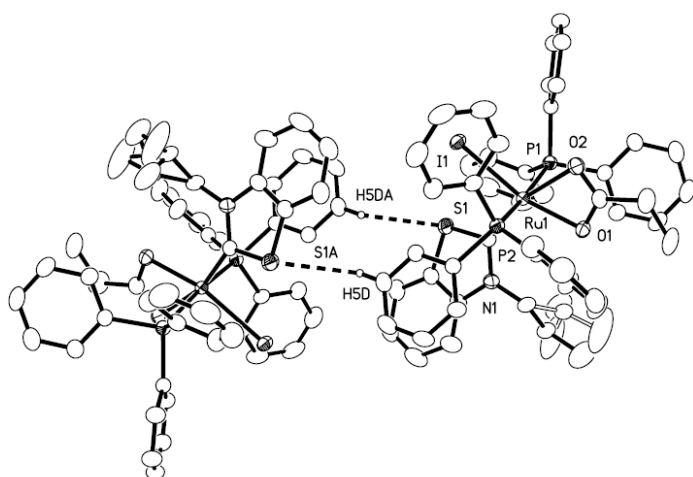

9: S1A...H5D, 2.908 Å (A: -x, -y+1, -z+1)

**Figure 2.** Intermolecular hydrogen bonding and short contact in

Complexes **4–9** with 50% probability ellipsoids.
